# Supplementary material for: Intracellular and Extracellular Metabolites from the Cyanobacterium Chlorogloeopsis fritschii, PCC 6912, During 48 Hours of UV-B Exposure
Source: MDPI journal article supplement (doi:10.3390/metabo9040074), 2019-04-16
Supplement: s1 [file s1]

Supplementary Material

# Intracellular and Extracellular Metabolites from the Cyanobacterium *Chlorogloeopsis fritschii*, PCC 6912, During 48 Hours of UV-B Exposure

Bethan Kultschar <sup>1,\*</sup>, Ed Dudley <sup>2</sup>, Steve Wilson <sup>3</sup> and Carole A. Llewellyn <sup>1,\*</sup>

<sup>1</sup> Department of Biosciences, Swansea University, Singleton Park, Swansea, SA2 8PP, UK

<sup>2</sup> Swansea University Medical School, Swansea University, Singleton Park, Swansea, SA2 8PP, UK; E.Dudley@swansea.ac.uk

<sup>3</sup> Unilever Corporate Research, Colworth Park, Sharnbrook, Bedfordshire, MK44 1LQ, UK; Steve.Wilson@Unilever.com

\* Correspondence: 878620@swansea.ac.uk (B.K.), C.A.Llewellyn@swansea.ac.uk (C.A.L.); Tel.: +44-1792-606168 (C.A.L.)

Received: 12 March 2019; Accepted: 13 April 2019; Published: 16 April 2019

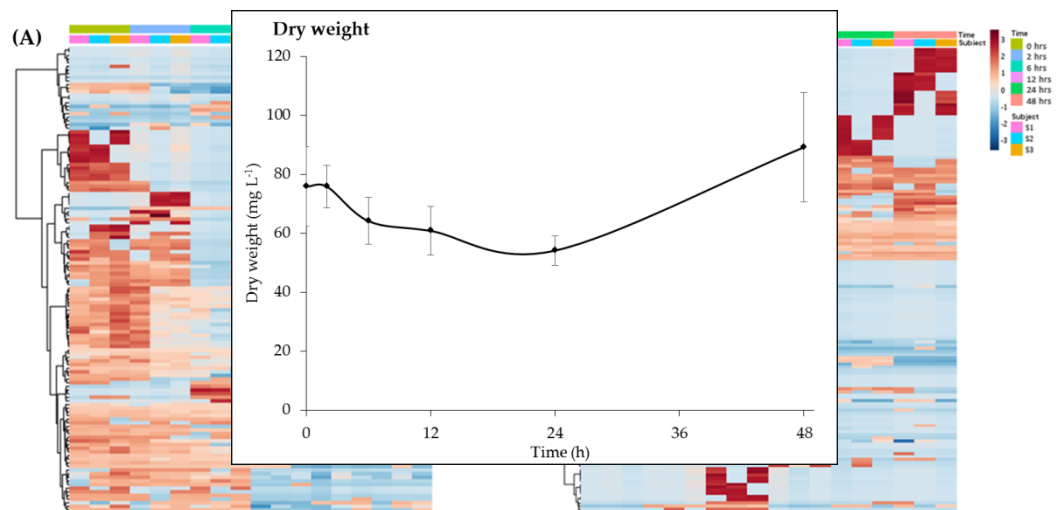

**Figure S1:** Hierarchical heatmap visualisation of the significant (A) intracellular and (B) extracellular peak intensities ( $p \leq 0.05$ ) during UV-B exposure using a one-way repeated measure ANOVA in MetaboAnalyst. Data is arranged in triplicate with increasing length of UV-B exposure from left to right (0–48 h). S1 = replicate 1, S2 = replicate 2, S3 = replicate 3.

**Figure S2:** Dry weight measurements of *C. fritschii* cultures during 48 h of supplemented UV-B exposure. All values are the mean of three biological replicates  $\pm$  standard error.

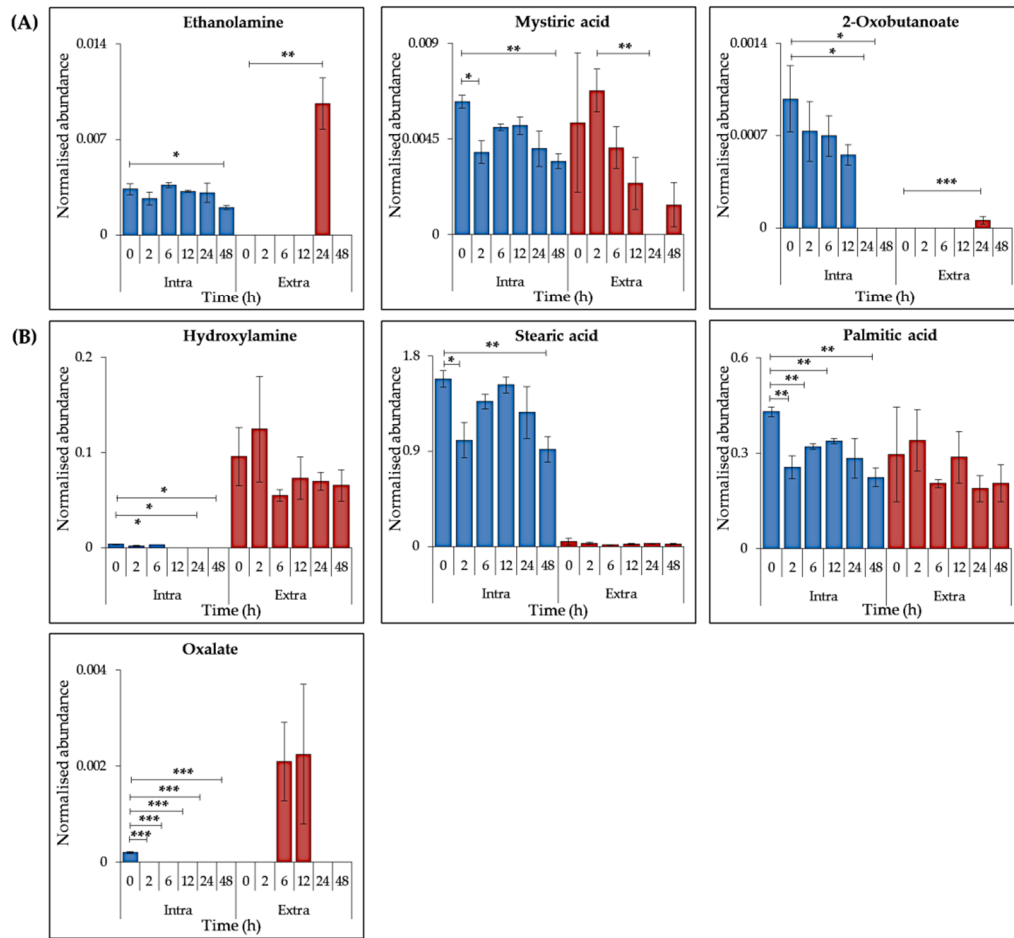

**Figure S3:** Time-series metabolomics data of *C. fritschii* during 48 h of UV-B exposure showing primary metabolites found in both intra- and extracellular during GC-MS analysis. **(A)** Metabolites showing statistically significant ( $p \leq 0.05$ ) changes over time in intra- and extracellular data; **(B)** metabolites showing statistically significant ( $p \leq 0.05$ ) changes over time in intracellular samples only. Statistical significance was measured using a two-sample T-test comparing control (0 h) to each treatment time point (2, 6, 12, 24 and 48 h) and between treatment time points, \* =  $0.05 \geq p \geq 0.01$ , \*\* =  $0.01 \geq p \geq 0.001$  and \*\*\* =  $p \leq 0.001$ .
